# Supplementary material for: Itaconic acid-based hyperbranched polymer toughened epoxy resins with rapid stress relaxation, superb solvent resistance and closed-loop recyclability
Source: Royal Society of Chemistry journal article supplement (doi:10.1039/d2gc01541b), 2022-01-01
Supplement: d2gc01541b3.pdf [file d2gc01541b3.pdf]

### Supporting information

#### **Itaconic acid-based hyperbranched polymer toughened epoxy resins with rapid stress relaxation, superb solvent resistance and closed-loop recyclability**

Junheng Zhang<sup>a,b\*</sup>, Zhangjie Gong<sup>a</sup>, Cheng Wu<sup>a</sup>, Tingcheng Li<sup>a</sup>, Yuanyu Tang<sup>a</sup>, Jinde Wu<sup>a</sup>, Can Jiang<sup>a</sup>,  
Menghe Miao<sup>c</sup>, Daohong Zhang<sup>a\*</sup>

<sup>a</sup>Key Laboratory of Catalysis and Energy Materials Chemistry of Ministry of Education & Hubei Key Laboratory of Catalysis and Materials Science, Hubei R&D Center of Hyperbranched Polymers Synthesis and Applications, South-Central Minzu University, Wuhan 430074, China.

<sup>b</sup>Hubei Three Gorges Laboratory, Yichang, 443007, China

<sup>c</sup>CSIRO Manufacturing, 75 Pigdons Road, Waurin Ponds, Victoria 3216, Australia.

\*E-mail: mcjhzhang@gmail.com; zhangdh27@163.com

#### **SUMMARY**

**Figure S1.** FTIR spectra (a), <sup>1</sup>HNMR spectra (b), <sup>13</sup>CNMR spectra (c) and GPC trace (d) of IAHP.

**Figure S2.** DSC curves of DGEBA/IAHP after curing at 120 °C for 2 h.

**Figure S3.** The impact force-displacement curves of DGEBA/IAHP before and after reprocessed.

**Figure S4.** The TGA curves of different epoxy vitrimers (a) and DGEBA/IAHP at 150°C.

**Figure S5.** AFM images including height image, phase image and three-dimensional image of phase of DGEBA/IAHP before and after reprocessed.

**Table S1.** The formations of different epoxy vitrimers.

**Table S2.** Detailed results for DSC curves of DGEBA/IAHP, DGEBA/IA and DGEBA/IA/TBD mixtures.

**Table S3.** The mechanical properties of DGEBA/IA/TBD and DGEBA/IAHP.

**Table S4.** DMA data of original and reprocessed DGEBA/IAHP.

**Table S5.** Values of shape memory properties of the original and reprocessed of DGEBA/IAHP.

**Table S6.** The gel contents and swelling ratios of epoxy vitrimers

**Table S7.** Mechanical properties and DMA data of original and chemically recycled DGEBA/IAHP.

**Movie S1.** Shape recovery of different shaped DGEBA/IAHP in water.

**Movie S2.** The gripper designed with DGEBA/IAHP and used to move from cold to warm water.

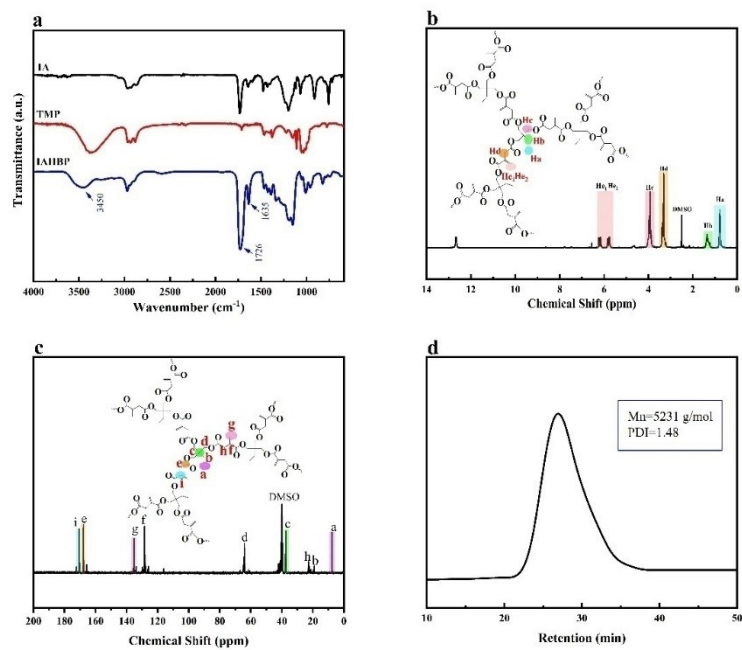

**Figure S1.** FTIR spectra (a),  $^1\text{H}$  NMR spectra (b),  $^{13}\text{C}$  NMR spectra (c), and GPC trace (d) of IAHP.

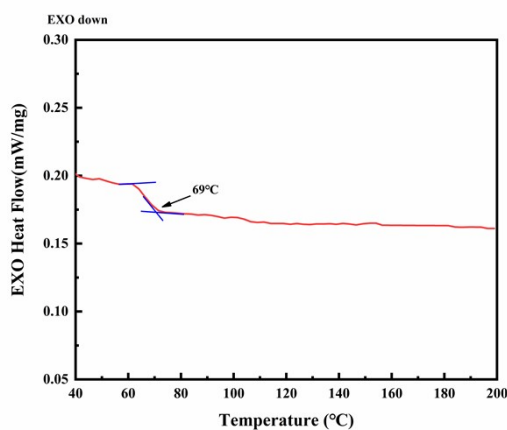

**Figure S2.** DSC curves of DGEBA/IAHP after curing at 120 °C for 2 h.

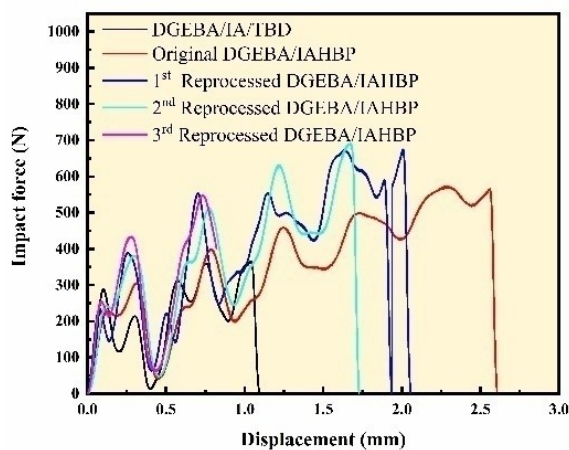

**Figure S3.** The impact force-displacement curves of DGEBA/IAHP before and after reprocessed.

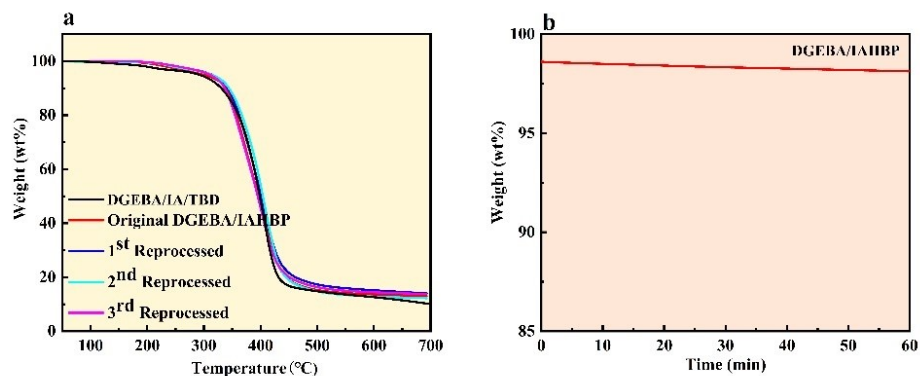

**Figure S4.** The TGA curves of different epoxy vitrimers (a) and DGEBA/IAHBP at 150°C.

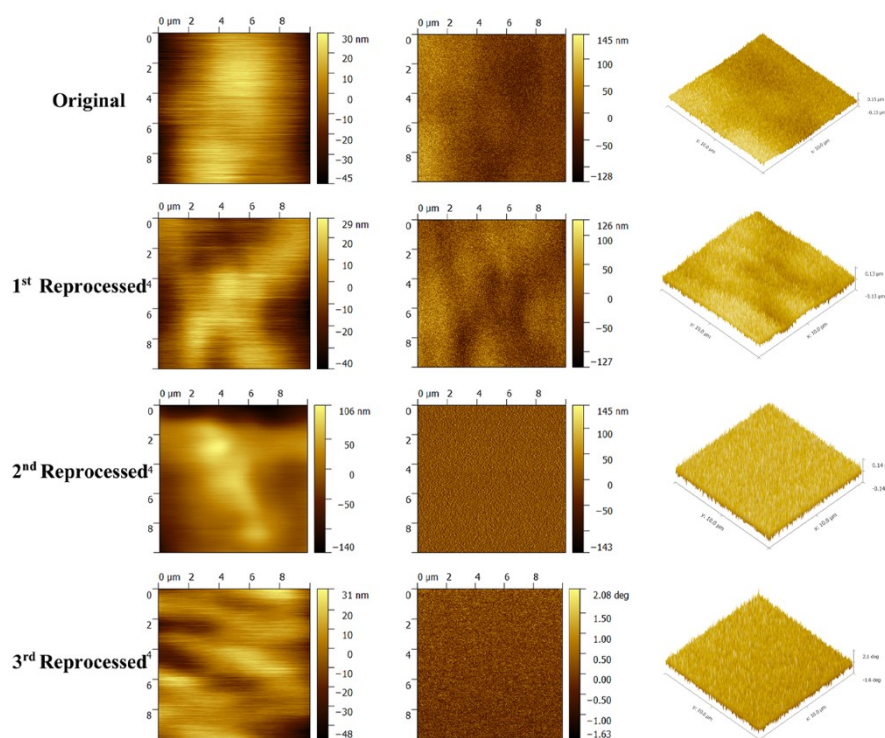

**Figure S5.** AFM images including height image, phase image and three-dimensional image of phase of DGEBA/IAHBP before and after reprocessed.

**Table S1.** The formations of different epoxy vitrimers.

| Samples      | DGEBA(g) | IAHBP(g) | IA(g) | TBD(g) |
|--------------|----------|----------|-------|--------|
| DGEBA/IAHBP  | 7.24     | 9.77     | 0.00  | 0.00   |
| DGEBA/IA     | 10.01    | 0.00     | 3.32  | 0.00   |
| DGEBA/IA/TBD | 10.01    | 0.00     | 3.32  | 0.13   |

**Table S2.** Detailed results for DSC curves of DGEBA/ IAHBP, DGEBA/IA and DGEBA/IA/TBD mixtures.

| Samples      | T <sub>i</sub> (°C) | T <sub>p</sub> (°C) | ΔH(J/g) |
|--------------|---------------------|---------------------|---------|
| DGEBA/IA/TBD | 121.8               | 175.5               | 189.3   |
| DGEBA/IA     | 133.0               | 181.1               | 145.9   |
| DGEBA/IAHBP  | 110.1               | 154.8               | 187.3   |

**Table S3.** The mechanical properties of DGEBA/IA/TBD and DGEBA/IAHBP.

| Samples                            | DGEBA/IA/TBD | DGEBA/IAHBP |                             |                             |                             |
|------------------------------------|--------------|-------------|-----------------------------|-----------------------------|-----------------------------|
|                                    |              | Original    | 1 <sup>st</sup> Reprocessed | 2 <sup>nd</sup> Reprocessed | 3 <sup>rd</sup> Reprocessed |
| Tensile strength, MPa              | 60.8 ± 2.1   | 91.0±3.2    | 83.2±2.5                    | 81.9±1.1                    | 82.6±1.1                    |
| Impact strength, KJ/m <sup>2</sup> | 8.7±1.2      | 18.4±0.2    | 17.9±1.6                    | 17.4±0.4                    | 17.5±0.1                    |
| Flexural strength, MPa             | 85.9±1.1     | 121.8±3.8   | 116.2±1.9                   | 115.5±0.1                   | 114.4±0.2                   |
| Flexural modulus, GPa              | 2.6±0.2      | 3.7±0.1     | 3.5±0.2                     | 3.3±0.2                     | 3.1±0.2                     |

**Table S4.** DMA data of original and reprocessed DGEBA/IAHBP.

| Samples | T <sub>g</sub> , °C | E <sub>c</sub> , MPa | E <sub>d</sub> , MPa | ρ, ×10 <sup>-3</sup> (mol/cm <sup>3</sup> ) |
|---------|---------------------|----------------------|----------------------|---------------------------------------------|
| R0      | 67                  | 2839.45              | 17.30                | 1.77                                        |
| R1      | 68                  | 2749.28              | 17.56                | 1.80                                        |
| R2      | 66                  | 2575.32              | 18.13                | 1.85                                        |
| R3      | 66                  | 2524.63              | 17.97                | 1.82                                        |

**Table S5.** Values of shape memory properties of the original and reprocessed of DGEBA/IAHBP.

| Samples                     | R <sub>f</sub> , % |      |      |      |      |      |      |      |      |      |
|-----------------------------|--------------------|------|------|------|------|------|------|------|------|------|
|                             | C1                 | C2   | C3   | C4   | C5   | C6   | C7   | C8   | C9   | C10  |
| Original sample             | 98.1               | 97.9 | 97.7 | 97.6 | 97.3 | 96.9 | 96.5 | 96.1 | 95.8 | 95.1 |
| 1 <sup>st</sup> Reprocessed | 94.2               | 93.9 | 94.0 | 94.2 | 94.6 | 94.1 | 94.0 | 93.8 | 94.2 | 94.6 |
| 2 <sup>nd</sup> Reprocessed | 93.4               | 93.2 | 93.5 | 93.1 | 93.1 | 93.5 | 93.7 | 93.8 | 93.1 | 93.4 |
| 3 <sup>rd</sup> Reprocessed | 92.5               | 92.3 | 92.4 | 92.6 | 92.7 | 92.4 | 92.0 | 92.6 | 92.1 | 92.3 |

  

| Samples                     | R <sub>r</sub> , % |      |      |      |      |      |      |      |      |      |
|-----------------------------|--------------------|------|------|------|------|------|------|------|------|------|
|                             | C1                 | C2   | C3   | C4   | C5   | C6   | C7   | C8   | C9   | C10  |
| Original sample             | 97.0               | 96.8 | 97.3 | 97.2 | 96.7 | 95.9 | 97.1 | 96.3 | 96.4 | 97.1 |
| 1 <sup>st</sup> Reprocessed | 97.3               | 96.8 | 98.3 | 97.5 | 97.3 | 98.0 | 96.7 | 97.4 | 98.2 | 97.7 |
| 2 <sup>nd</sup> Reprocessed | 97.2               | 97.9 | 97.3 | 97.5 | 97.9 | 97.3 | 96.6 | 97.7 | 96.2 | 96.3 |
| 3 <sup>rd</sup> Reprocessed | 97.8               | 97.4 | 98.2 | 97.9 | 97.4 | 98.3 | 97.5 | 97.8 | 96.2 | 97.3 |

**Table S6.** The gel contents and swelling ratios of epoxy vitrimers.

| Samples      | Gel contents, % | Swelling ratios |      |      |       |      |       |
|--------------|-----------------|-----------------|------|------|-------|------|-------|
|              |                 | THF             |      | DMSO |       | TCB  |       |
|              |                 | RT              | 40°C | RT   | 140°C | RT   | 140°C |
| DGEBA/IA/TBD | 96.3            | 13.9            | 21.2 | 18.8 | 31.3  | 10.5 | 21.3  |
| DGEBA/IAHBP  | 99.9            | 10.1            | 18.1 | 16.4 | 28.8  | 6.7  | 15.4  |

**Table S7.** Mechanical properties and DMA data of original and chemically recycled DGEBA/IAHBP.

| Samples                         | Tensile strength (MPa) | Toughness (MJ/m <sup>3</sup> ) | T <sub>g</sub> (°C) | E <sub>c</sub> (MPa) | ρ (×10 <sup>-3</sup> mol/cm <sup>3</sup> ) |
|---------------------------------|------------------------|--------------------------------|---------------------|----------------------|--------------------------------------------|
| Original DGEBA/IAHBP            | 91.0±3.2               | 2.5±2.1                        | 67                  | 2839.45              | 1.77                                       |
| Chemically recycled DGEBA/IAHBP | 81.8±1.5               | 2.6±1.9                        | 65                  | 2446.80              | 1.62                                       |
